# Supplementary material
Source: PubMed Central journal article supplement (PMC3725060)
Supplement: 1306241110_pnas.201306241SI.pdf [file 1306241110_pnas.201306241SI.pdf]

# Supporting Information

Szabo et al. 10.1073/pnas.1306241110

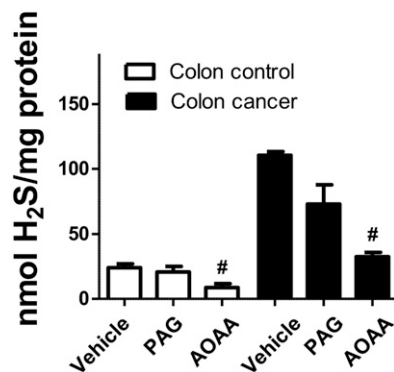

**Fig. S1.** Effect of the CBS inhibitor AOAA (1 mM) and the CSE inhibitor PAG (3 mM) on H<sub>2</sub>S production in homogenates of a colorectal cancer and patient-matched normal colonic tissue. H<sub>2</sub>S production was measured in homogenates of a human colorectal cancer specimen by the methylene blue method. H<sub>2</sub>S production was stimulated in tissue or cell lysates by incubation at 37 °C (30 min) in presence of the L-cysteine (3 mM). H<sub>2</sub>S production was significantly higher in colon cancer tissues, compared with their corresponding controls. AOAA (1 mM) attenuated the H<sub>2</sub>S-producing activity of the tissue homogenates (<sup>#</sup>*P* < 0.05), whereas PAG (3 mM) had no significant effect. Data represent mean ± SEM of *n* = 3 determinations.











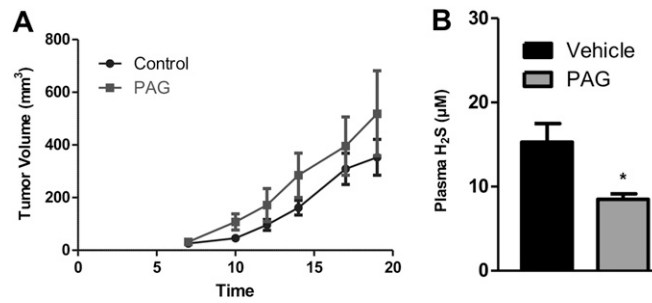

**Fig. S7.** Pharmacological inhibition of CSE by PAG does not inhibit colon cancer growth in vivo. Effect of PAG treatment (50 mg/kg·d<sup>-1</sup>) on (A) tumor volume and (B) plasma H<sub>2</sub>S levels in Nu/nu Balb/C female mice (8–10 wk) injected s.c. in the right and left dorsum (10<sup>6</sup> cells per side with HCT116 cells). Consistent with the role of CSE in contributing to circulating H<sub>2</sub>S levels (1), PAG attenuated systemic H<sub>2</sub>S levels (B), but it failed to affect tumor growth (A). Data represent mean ± SEM of *n* = 6 animals per group.

1. Yang G, et al. (2008) H<sub>2</sub>S as a physiologic vasorelaxant: Hypertension in mice with deletion of cystathionine gamma-lyase. *Science* 322(5901):587–590.

**Table S1. Clinicopathologic information of the human colon cancer samples used in the current study**

| Patient sample | Age | Sex | Stage                      |
|----------------|-----|-----|----------------------------|
| CN052710       | 66  | F   | Normal margin of stage III |
| CN051310       | 60  | M   | Normal margin of stage III |
| CN041411       | 63  | F   | Normal margin of adenoma   |
| CT121009       | 47  | F   | Chronic inflammation       |
| CT121509       | 30  | M   | Stage II                   |
| CT041411       | 63  | F   | Adenoma                    |
| CN/CT060710    | 78  | F   | Stage II                   |
| CN/CT060310    | 88  | F   | Stage II                   |
| CN/CT071210    | 75  | M   | Stage II                   |
| CN/CT052912#24 | 28  | M   | Stage III                  |
